# Supplementary material
Source: PubMed Central journal article supplement (PMC4865592)
Supplement: jcbn15-135sf01.pdf [file jcbn15-135sf01.pdf]

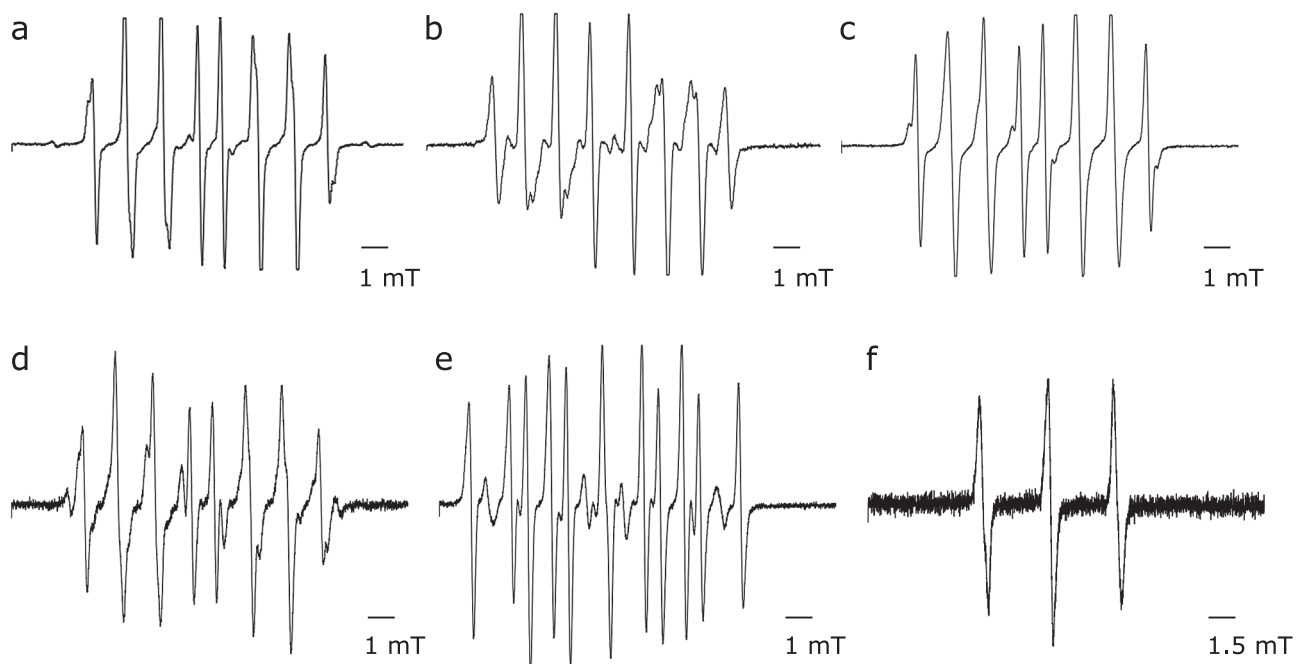

**Supplemental. Fig. 1.** Typical representative ESR spectra of (a)  $\cdot\text{OH}$ , (b)  $\text{O}_2^{\cdot-}$ , (c)  $\text{RO}\cdot$ , (d)  $\text{ROO}\cdot$ , (e)  $\text{R}\cdot$  and (f)  $^1\text{O}_2$  observed in the study.
